# Supplementary material for: Dynamic control of head mesoderm patterning
Source: Oxford University Press journal article supplement (doi:10.1242/dev.062737), 2011-06-07
Supplement: dev062737tables1.pdf [file dev062737tables1.pdf]

Table S1. Summary of results

| Treatment | Markers     |             |                     |                                               |             |             |              |              |                                                      |                                      |             |                     |                                    |                                               |
|-----------|-------------|-------------|---------------------|-----------------------------------------------|-------------|-------------|--------------|--------------|------------------------------------------------------|--------------------------------------|-------------|---------------------|------------------------------------|-----------------------------------------------|
|           | Pitx2       | Alx4        | MyoR                | Tbx1                                          | Twist       | Myf5        | paraxis      | Pax3         | Isl1                                                 | Nkx2.5                               | Cyp26C1     | HoxB1               | noggin                             | Mkp3/Pyst                                     |
| RA        | down        | no response | down                | down; response weaker than for Pitx2 and MyoR | no response | no response | no response  | no response  | no response in hm (down in cm)                       | no response in hm (down in cm)       | no response | up at HH8 and later | no response                        | no response anterior, down in p/hm up in a/hm |
| Bmp       | no response | up          | up at HH9           | down                                          | no response | no response | down in p/hm | down in p/hm | up in hm at HH5-6, no response later                 | up in hm at HH5-6, no response later | down        | no response         | up                                 |                                               |
| noggin    | no response | down        | down                | slightly up                                   | no response | no response | slightly up  | slightly up  |                                                      |                                      |             |                     | down                               |                                               |
| Fgf       | down        | down        | up at HH9           | up                                            | no response | no response | no response  | no response  | no response in hm (up within endogenous Isl1 domain) | no response in hm                    | down        | no response         | up anterior, no response posterior | up                                            |
| SU5402    | up          | no response | down                | down                                          | no response | no response | no response  | no response  |                                                      |                                      |             |                     |                                    | down                                          |
| Fgf + Bmp |             |             | up already at HH7-8 | upregulation by Fgf suppressed                |             |             |              |              |                                                      |                                      |             |                     |                                    |                                               |

a/hm, anterior head mesoderm; cm, cardiac mesoderm; hm, head mesoderm; p/hm, posterior head mesoderm.
